# Supplementary material for: Long-Term Exposure to Neighborhood Policing and the Racial/Ethnic Gap in High School Graduation
Source: Oxford University Press journal article supplement (doi:10.1215/00703370-10188919), 2022-09-06
Supplement: legewie_esm.pdf [file legewie_esm.pdf]

## Appendix Tables and Figures

Table A1 - Temporal Structure of Time-varying Covariates and Treatment for 2005-2006 Middle School Cohort

| Calendar Year | School Year | Term   | Time (t) | Grade | Covariates | Treatment | Outcome |
|---------------|-------------|--------|----------|-------|------------|-----------|---------|
|               | 2005-2006   | Fall   |          | 6     |            |           |         |
| 2006          |             | Spring | 1        |       | $L_0$      |           |         |
|               | 2006-2007   | Fall   | 1        | 7     |            | $A_0$     |         |
| 2007          |             | Spring | 2        |       | $L_1$      |           |         |
|               | 2007-2008   | Fall   | 2        | 8     |            | $A_1$     |         |
| 2008          |             | Spring | 3        |       | $L_2$      |           |         |
|               | 2008-2009   | Fall   | 3        | 9     |            | $A_2$     |         |
| 2009          |             | Spring | 4        |       | $L_3$      |           |         |
|               | 2009-2010   | Fall   | 4        | 10    |            | $A_3$     |         |
| 2010          |             | Spring | 5        |       | $L_4$      |           |         |
|               | 2010-2011   | Fall   | 5        | 11    |            | $A_4$     |         |
| 2011          |             | Spring | 6        |       | $L_5$      |           |         |
|               | 2011-2012   | Fall   | 6        | 12    |            | $A_5$     |         |
| 2012          |             | Spring |          |       |            |           |         |
|               | 2012-2013   | Fall   |          |       |            |           |         |
| 2013          |             | Spring |          |       |            |           | Y       |

Note: The grade column refers to on-time progress.

Table A2 – Marginal Structural Models: Effect of Cumulative, Long-Term Exposure to Neighborhood Police Stops on High School graduation by Race/Ethnicity (continuous treatment)

|                                          | White               | Black                | Latino               |
|------------------------------------------|---------------------|----------------------|----------------------|
| Cumulative SQF Exposure (logged)         | -0.016**<br>(0.005) | -0.038***<br>(0.007) | -0.017***<br>(0.005) |
| Student and Neighborhood Characteristics | ✓                   | ✓                    | ✓                    |
| Cohort Fixed Effect                      | ✓                   | ✓                    | ✓                    |
| Precinct Fixed Effect                    | ✓                   | ✓                    | ✓                    |
| Observations                             | 36,396              | 85,490               | 109,291              |

\*P < 0.05, \*\*P < 0.01, \*\*\*P < 0.001

Table A3 –Effect of Cumulative Exposure to Neighborhood Low-Level Arrests on HS graduation

|                                             | White               | Black                | Latino               |
|---------------------------------------------|---------------------|----------------------|----------------------|
| Cumulative SQF Exposure (Ref.: Very low)    |                     |                      |                      |
| Low                                         | -0.013**<br>(0.005) | -0.029***<br>(0.005) | -0.028***<br>(0.005) |
| Average                                     | -0.013<br>(0.007)   | -0.053***<br>(0.006) | -0.044***<br>(0.006) |
| High                                        | -0.031**<br>(0.010) | -0.073***<br>(0.007) | -0.048***<br>(0.006) |
| Very High                                   | -0.029*<br>(0.012)  | -0.062***<br>(0.008) | -0.042***<br>(0.007) |
| Student and Neighborhood<br>Characteristics | ✓                   | ✓                    | ✓                    |
| Cohort Fixed Effect                         | ✓                   | ✓                    | ✓                    |
| Precinct Fixed Effect                       | ✓                   | ✓                    | ✓                    |
| Observations                                | 36,396              | 85,490               | 109,291              |

\*P < 0.05, \*\*P < 0.01, \*\*\*P < 0.001

Table A4 – Effect of Cumulative Exposure compared to Middle and High School Exposure (White and Latino Students)

|                                          | White              |                   |                   | Latino               |                    |                      |
|------------------------------------------|--------------------|-------------------|-------------------|----------------------|--------------------|----------------------|
|                                          | Cum. Exposure      | MS Exposure       | HS Exposure       | Cum. Exposure        | MS Exposure        | HS Exposure          |
| Cumulative SQF Exposure (Ref.: Very low) |                    |                   |                   |                      |                    |                      |
| Low                                      | -0.012*<br>(0.005) | -0.007<br>(0.005) | 0.000<br>(0.005)  | -0.024***<br>(0.005) | -0.011<br>(0.008)  | -0.013*<br>(0.006)   |
| Average                                  | -0.012<br>(0.006)  | -0.004<br>(0.006) | -0.007<br>(0.006) | -0.041***<br>(0.006) | -0.013<br>(0.008)  | -0.022***<br>(0.007) |
| High                                     | -0.021*<br>(0.010) | -0.011<br>(0.008) | -0.015<br>(0.009) | -0.049***<br>(0.007) | -0.019*<br>(0.009) | -0.029***<br>(0.007) |
| Very High                                | -0.034<br>(0.018)  | -0.022<br>(0.015) | -0.005<br>(0.015) | -0.047***<br>(0.010) | -0.017<br>(0.010)  | -0.028**<br>(0.009)  |
| Student and Neighborhood Characteristics | ✓                  | ✓                 | ✓                 | ✓                    | ✓                  | ✓                    |
| Cohort Fixed Effect                      | ✓                  | ✓                 | ✓                 | ✓                    | ✓                  | ✓                    |
| Precinct Fixed Effect                    | ✓                  | ✓                 | ✓                 | ✓                    | ✓                  | ✓                    |
| Observations                             | 36,396             | 36,396            | 36,396            | 109,291              | 109,291            | 109,291              |

Note: For white students, the difference in effect size between cumulative and middle or high school exposure is not statistically significant for all levels of exposure. For Latino students, the difference in effect size between cumulative and middle or high school exposure is statistically significant at the 0.05 level for “Average” and “High” exposure compared to “Very Low” exposure.

\*P < 0.05, \*\*P < 0.01, \*\*\*P < 0.001

Table A5 – Assignment probabilities under different interventions

| Neighborhood<br>Police Stops         | Observed | Intervention |       |       |       |
|--------------------------------------|----------|--------------|-------|-------|-------|
|                                      |          | 1            | 2     | 3     | 4     |
| <b>Black</b>                         |          |              |       |       |       |
| Very Low (1 <sup>st</sup> quintile)  | 12.8%    | 100%         | 51.4% | 13.3% | 24.6% |
| Low (2 <sup>nd</sup> quintile)       | 17.2%    | 0%           | 27.6% | 18.8% | 26.2% |
| Average (3 <sup>rd</sup> quintile)   | 21.6%    | 0%           | 13.0% | 21.7% | 22.9% |
| High (4 <sup>th</sup> quintile)      | 23.5%    | 0%           | 5.3%  | 22.3% | 17.4% |
| Very High (5 <sup>th</sup> quintile) | 24.9%    | 0%           | 2.8%  | 23.9% | 8.9%  |
| <b>White</b>                         |          |              |       |       |       |
| Very Low (1 <sup>st</sup> quintile)  | 51.4%    | 100%         | 51.4% | 44.8% | 64.3% |
| Low (2 <sup>nd</sup> quintile)       | 27.6%    | 0%           | 27.6% | 30.0% | 23.2% |
| Average (3 <sup>rd</sup> quintile)   | 13.0%    | 0%           | 13.0% | 14.9% | 8.3%  |
| High (4 <sup>th</sup> quintile)      | 5.3%     | 0%           | 5.3%  | 6.9%  | 3.3%  |
| Very High (5 <sup>th</sup> quintile) | 2.8%     | 0%           | 2.8%  | 3.4%  | 0.9%  |
| <b>Latino</b>                        |          |              |       |       |       |
| Very Low (1 <sup>st</sup> quintile)  | 15.3%    | 100%         | 51.4% | 16.4% | 28.6% |
| Low (2 <sup>nd</sup> quintile)       | 19.6%    | 0%           | 27.6% | 20.1% | 25.5% |
| Average (3 <sup>rd</sup> quintile)   | 21.1%    | 0%           | 13.0% | 20.6% | 20.8% |
| High (4 <sup>th</sup> quintile)      | 22.1%    | 0%           | 5.3%  | 20.0% | 16.2% |
| Very High (5 <sup>th</sup> quintile) | 21.9%    | 0%           | 2.8%  | 22.9% | 8.8%  |

Note: “Proportion gap closed” is defined as (Observed - Counterfactual) / Observed.
